# Supplementary material for: Who lacks and who benefits from diet diversity: evidence from (impact) profiling for children in Zimbabwe
Source: PubMed Central journal article supplement (PMC7640455; doi:10.1186/s12942-020-00240-2), 2020-11-04
Supplement: 12942_2020_240_MOESM3_ESM.pdf [file 12942_2020_240_MOESM3_ESM.pdf]

## Additional File 3: Selected variables and univariate (parametric) analysis

The set of variables included as potentially relevant for diet diversity including the potential outcomes for these variables is summarized in Table S.3.1. Outcomes are grouped to create the classes used in the analyses and hence do not necessarily follow classes defined in the DHS or other databases used.

**Table S.3.1. Longlist of variables for the analysis**

|    | <b>Variable name</b>                   | <b>Outcomes</b>                                                                                                                                                                                                                                                                                             |
|----|----------------------------------------|-------------------------------------------------------------------------------------------------------------------------------------------------------------------------------------------------------------------------------------------------------------------------------------------------------------|
| 1  | Age of child                           | 6-12 months, >12 months                                                                                                                                                                                                                                                                                     |
| 2  | Gender of child                        | Male, female                                                                                                                                                                                                                                                                                                |
| 3  | Child has sibling(s) of $\leq 5$ years | No, yes                                                                                                                                                                                                                                                                                                     |
| 4  | Age of mother                          | < 35, $\geq 35$                                                                                                                                                                                                                                                                                             |
| 5  | Education of mother                    | No education, primary, secondary, higher                                                                                                                                                                                                                                                                    |
| 6  | Marital status                         | Never in union, married, living with partner, widowed, divorced, no longer living together/separated                                                                                                                                                                                                        |
| 7  | Mother is currently working            | No, yes                                                                                                                                                                                                                                                                                                     |
| 8  | Age of household head                  | < 45, $\geq 45$                                                                                                                                                                                                                                                                                             |
| 9  | Sex of household head                  | Male, female                                                                                                                                                                                                                                                                                                |
| 10 | Wealth quintile (urban/rural specific) | Poorest/poorer, middle, richer/richest                                                                                                                                                                                                                                                                      |
| 11 | Location                               | Urban, rural                                                                                                                                                                                                                                                                                                |
| 12 | Farming system                         | Irrigated, tree crop, forest based, rice-tree crop, highland perennial, highland temperate mixed, root crop/cereal-root crop mixed, maize mixed, large commercial and smallholder/pastoral, agropastoral millet sorghum, sparse (arid), coastal artisan fisheries, irrigated area in rainfed farming system |
| 13 | Land use                               | >50% Cultivated land, > 50% forest/barren land, >50% grass and woodland, >50% built up land, land cover associations                                                                                                                                                                                        |
| 14 | Suitability under high input use       | >75% Very high, >63% high, >50% good, >35% medium, >20% moderate, >10% marginal, >0% very marginal, unsuitable, water                                                                                                                                                                                       |
| 15 | Suitability under low input use        | >75% Very high, >63% high, >50% good, >35% medium, >20% moderate, >10% marginal, >0% very marginal, unsuitable, water                                                                                                                                                                                       |
| 16 | Length of Growing Period (LGP)         | 0-75 Days, 76-120 days, 121-180 days, >180 days                                                                                                                                                                                                                                                             |
| 17 | Altitude                               | 0-500 m, 500-1000 m, 1000-2000 m, > 2000 m                                                                                                                                                                                                                                                                  |
| 18 | Slope                                  | 0-8%, 8-30%, >30%                                                                                                                                                                                                                                                                                           |

**Table S.3.2. Summary statistics of variables for analysis**

| Variable                                                               | Obs   | Mean | Std. | Dev. | Min  |
|------------------------------------------------------------------------|-------|------|------|------|------|
| Stunted (dummy)                                                        | 1,613 | 0.23 | 0.42 | 0    | 1    |
| Inadequate diet diversity (dummy)                                      | 1,613 | 0.54 | 0.50 | 0    | 1    |
| Age of child (years)                                                   | 1,613 | 1.24 | 0.43 | 0.50 | 2.08 |
| Gender of child (dummy, male=1)                                        | 1,613 | 0.51 | 0.49 | 0    | 1    |
| Child has sibling(s) of ≤5 years (dummy)                               | 1,613 | 0.55 | 0.50 | 0    | 1    |
| Age of mother (dummy, ≥ 35 years=1)                                    | 1,613 | 0.14 | 0.34 | 0    | 1    |
| <u>Education mother (omitted: `none`)</u>                              |       |      |      |      |      |
| Primary (dummy)                                                        | 1,613 | 0.33 | 0.47 | 0    | 1    |
| Secondary (dummy)                                                      | 1,613 | 0.61 | 0.49 | 0    | 1    |
| Tertiary (dummy)                                                       | 1,613 | 0.04 | 0.19 | 0    | 1    |
| <u>Marital status (omitted: `Never in union`)</u>                      |       |      |      |      |      |
| Married (dummy)                                                        | 1,613 | 0.84 | 0.37 | 0    | 1    |
| Living with partner (dummy)                                            | 1,613 | 0.04 | 0.19 | 0    | 1    |
| Widowed (dummy)                                                        | 1,613 | 0.01 | 0.11 | 0    | 1    |
| Divorced (dummy)                                                       | 1,613 | 0.03 | 0.17 | 0    | 1    |
| No longer living together/separated (dummy)                            | 1,613 | 0.04 | 0.19 | 0    | 1    |
| Mother is currently working (dummy)                                    | 1,613 | 0.38 | 0.49 | 0    | 1    |
| Age of household head (dummy, ≥ 45 years=1)                            | 1,613 | 0.24 | 0.43 | 0    | 1    |
| Sex of household head (dummy, male=1)                                  | 1,613 | 0.63 | 0.48 | 0    | 1    |
| <u>Wealth quintile (omitted: `Poorest`)</u>                            |       |      |      |      |      |
| 2 <sup>nd</sup> Quintile (dummy)                                       | 1,613 | 0.21 | 0.40 | 0    | 1    |
| 3 <sup>rd</sup> Quintile (dummy)                                       | 1,613 | 0.20 | 0.40 | 0    | 1    |
| 4 <sup>th</sup> Quintile (dummy)                                       | 1,613 | 0.15 | 0.36 | 0    | 1    |
| 5 <sup>th</sup> Quintile (dummy)                                       | 1,613 | 0.16 | 0.36 | 0    | 1    |
| Urban (dummy)                                                          | 1,613 | 0.26 | 0.44 | 0    | 1    |
| <u>Farming system (omitted: `Highland temperate mixed`)</u>            |       |      |      |      |      |
| Root crop/Cereal-root crop mixed                                       | 1,613 | 0.01 | 0.11 | 0    | 1    |
| Maize mixed                                                            | 1,613 | 0.79 | 0.41 | 0    | 1    |
| Large commercial and smallholder/Pastor                                | 1,613 | 0.00 | 0.06 | 0    | 1    |
| Agropastoral millet sorghum                                            | 1,613 | 0.11 | 0.31 | 0    | 1    |
| <u>Land use (omitted: `&gt;50% Cultivated land`)</u>                   |       |      |      |      |      |
| > 50% forest/barren land                                               | 1,613 | 0.32 | 0.47 | 0    | 1    |
| >50% grass and woodland                                                | 1,613 | 0.38 | 0.49 | 0    | 1    |
| >50% built up land                                                     | 1,613 | 0.14 | 0.35 | 0    | 1    |
| Land cover associations                                                | 1,613 | 0.13 | 0.33 | 0    | 1    |
| <u>Suitability under high input use (omitted: `&gt;75% Very high`)</u> |       |      |      |      |      |
| >63% high                                                              | 1,613 | 0.37 | 0.48 | 0    | 1    |
| >50% good                                                              | 1,613 | 0.18 | 0.39 | 0    | 1    |
| >35% medium                                                            | 1,613 | 0.07 | 0.25 | 0    | 1    |
| >20% moderate                                                          | 1,613 | 0.03 | 0.17 | 0    | 1    |
| >10% marginal                                                          | 1,613 | 0.04 | 0.19 | 0    | 1    |
| Water                                                                  | 1,613 | 0.00 | 0.00 | 0    | 0    |

| <u>Suitability under low input use (omitted: `&gt;50% good/high/very good')</u> |       |      |      |   |   |
|---------------------------------------------------------------------------------|-------|------|------|---|---|
| >35% medium                                                                     | 1,613 | 0.25 | 0.43 | 0 | 1 |
| >0% (very) marginal/moderate                                                    | 1,613 | 0.24 | 0.43 | 0 | 1 |
| <u>Length of Growing Period (omitted: `0-75 Days')</u>                          |       |      |      |   |   |
| 76-120 days                                                                     | 1,613 | 0.13 | 0.34 | 0 | 1 |
| 121-180 days                                                                    | 1,613 | 0.71 | 0.45 | 0 | 1 |
| >180 days                                                                       | 1,613 | 0.11 | 0.32 | 0 | 1 |
| <u>Altitude (omitted: `0-500 m')</u>                                            |       |      |      |   |   |
| 500-1000 m (dummy)                                                              | 1,613 | 0.27 | 0.44 | 0 | 1 |
| 1000-2000 m (dummy)                                                             | 1,613 | 0.66 | 0.47 | 0 | 1 |
| <u>Slope (omitted: `0-8%')</u>                                                  |       |      |      |   |   |
| 8-30%                                                                           | 1,613 | 0.74 | 0.44 | 0 | 1 |
| >30%                                                                            | 1,613 | 0.12 | 0.33 | 0 | 1 |

Note: figures are weighted with sampling weights

Ranking of variables by p-value is presented in Table S.3.3, where the 10 selected variables are indicated with an “\*” in the final column (with p-value<0.10).

**Table S.3.3. Top-10 of variables selected**

|    | <b>Variable name</b>                   | <b>p-value</b> | <b>R squared</b> | <b>Selected</b> |
|----|----------------------------------------|----------------|------------------|-----------------|
| 1  | Age of child                           | 0.000000       | 0.101            | *               |
| 2  | Working status of mother               | 0.000000       | 0.021            | *               |
| 3  | Education                              | 0.000001       | 0.018            | *               |
| 4  | Wealth quintile (urban/rural specific) | 0.00001        | 0.013            | *               |
| 5  | Child has sibling(s) of ≤5 years       | 0.00002        | 0.011            | *               |
| 6  | Location                               | 0.00002        | 0.011            | *               |
| 7  | Land use                               | 0.001          | 0.010            | *               |
| 8  | Length of Growing Period (LGP)         | 0.02           | 0.006            | *               |
| 9  | Farming system                         | 0.04           | 0.006            | *               |
| 10 | Slope                                  | 0.09           | 0.003            | *               |
| 11 | Suitability under high input use       | 0.16           | 0.005            |                 |
| 12 | Altitude                               | 0.30           | 0.001            |                 |
| 13 | Marital status                         | 0.31           | 0.003            |                 |
| 14 | Suitability under low input use        | 0.34           | 0.001            |                 |
| 15 | Age of mother                          | 0.57           | 0.000            |                 |
| 16 | Sex of household head                  | 0.58           | 0.000            |                 |
| 17 | Gender of child                        | 0.59           | 0.000            |                 |
| 18 | Age of household head                  | 0.95           | 0.000            |                 |
